# Supplementary material for: The design and synthesis of inhibitors of pantothenate synthetase
Source: Royal Society of Chemistry journal article supplement (doi:10.1039/b609482a), 2006-01-01
Supplement: b609482a.pdf [file b609482a.pdf]

## Electronic Supporting Information (ESI)

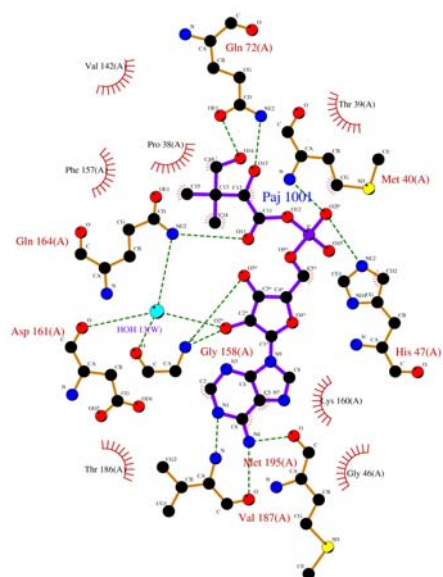

### Key

- Ligand bond
- Non-ligand bond
- Hydrogen bond
- ~~~~~ His 53 Non-ligand residues involved in hydrophobic contact(s)
- Corresponding atoms involved in hydrophobic contact(s)

Diagram of binding interactions made by pantoyl adenylate in the active site of *M. tuberculosis* pantothenate synthetase based on the crystal structure of pantothenate synthetase in complex with pantoyl adenylate **2**. Figure generated using LIGPLOT<sup>15</sup> (from PDB coordinates 1n2h).

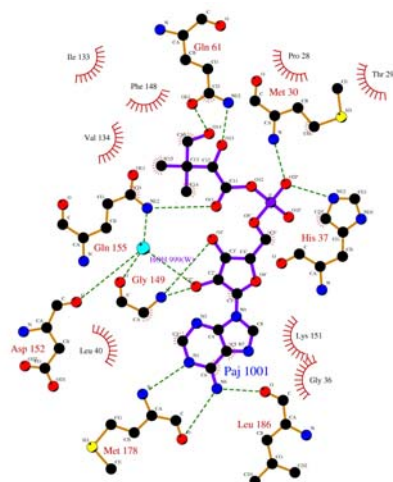

### Key

- Ligand bond
- Non-ligand bond
- Hydrogen bond
- ~~~~~ His 53 Non-ligand residues involved in hydrophobic contact(s)
- Corresponding atoms involved in hydrophobic contact(s)

Diagram of binding interactions made by pantoyl adenylate **2** in the model of the close structure of active site of *E. coli* pantothenate synthetase. Figure generated using LIGPLOT<sup>15</sup>.
